# Supplementary material
Source: PubMed Central journal article supplement (PMC10762577)
Supplement: jama-e2323727-s001.pdf [file jama-e2323727-s001.pdf]

43 **SECTION 1: STUDY DESCRIPTION AND METHODS**

44 **Summary**

45 This is an individually randomized study with a factorial design, being conducted among married women  
 46 aged 18-30 years living in urban and peri-urban low-mid socioeconomic neighbourhoods in South Delhi.

47

48 **Study design and objectives**

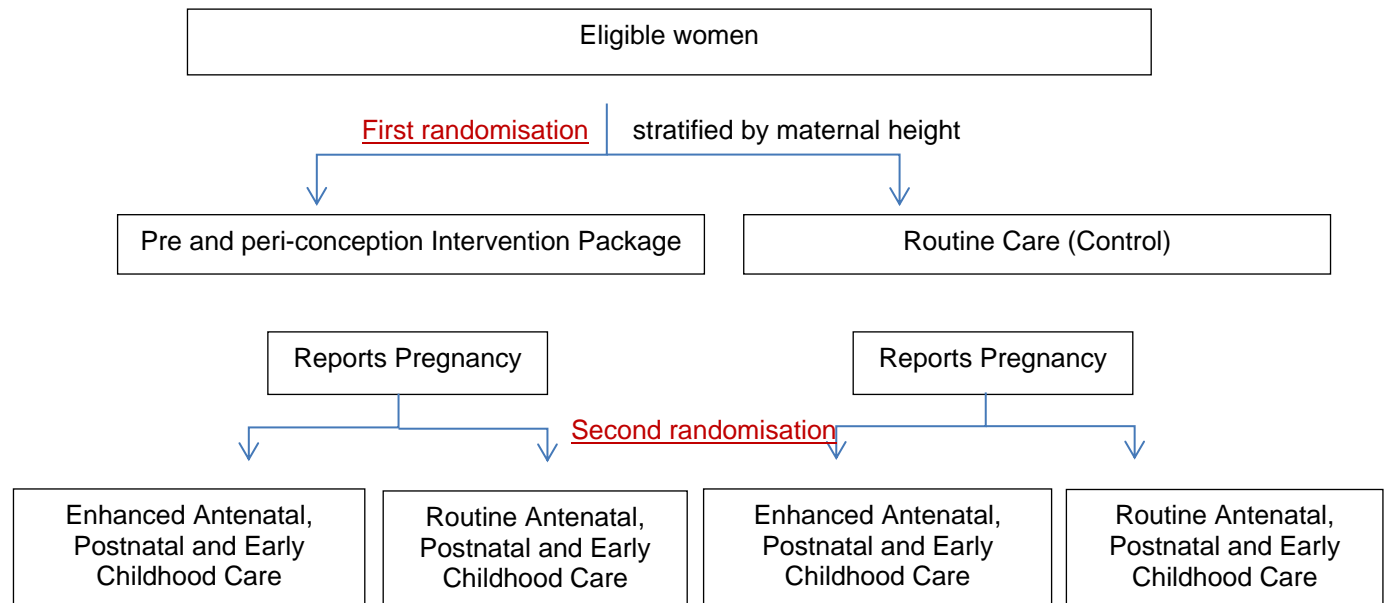

The two randomizations will result in four groups (Group A, Group B, Group C and Group D) which will eventually receive the following

| <b>Group A</b>                                            | <b>Group B</b>                                           | <b>Group C</b>                                            | <b>Group D</b><br>(Control Group)                        |
|-----------------------------------------------------------|----------------------------------------------------------|-----------------------------------------------------------|----------------------------------------------------------|
| Pre- and Peri-conception Intervention Package             | Pre- and Peri-conception Intervention Package            | No Pre- and Peri-conception Intervention Package          | No Pre- and Peri-conception Intervention Package         |
| and                                                       | and                                                      | and                                                       | and                                                      |
| Enhanced Antenatal and Postnatal and Early Childhood Care | Routine Antenatal and Postnatal and Early Childhood Care | Enhanced Antenatal and Postnatal and Early Childhood Care | Routine Antenatal and Postnatal and Early Childhood Care |

49 Briefly eligible women are identified through a door-to-door survey. Those who consent for participation  
 50 are enrolled (first randomization) and followed up until they are confirmed to be pregnant or have  
 51 completed 18 months of follow up post-enrolment. Once pregnancy is confirmed, consent is taken  
 52 (second randomization) from the women for her and her infant's participation in the trial.

53

54 **Inclusion criteria**

55 Women aged 18–30 years, married and living with their husband, with no or one child and wish to have a  
56 child, and consent for participation in the study.

57

58 **Exclusion criteria**

59 Families who plan to move out of the study area or live in temporary housing (households without  
60 concrete roof, toilet, water connection and legal electricity) are excluded as they are likely to be relocated  
61 by the government in the near future.

62

63 **Objectives**

64 **Primary Objectives**

65 To determine the effect of integrated and concurrent delivery of interventions to improve health, nutrition,  
66 WASH and psychosocial status:

67 - during pre- and peri-conception period alone (**pre- and peri-conception intervention package**)

68 - during pregnancy and early childhood (**enhanced antenatal, postnatal and early childhood  
69 care**) and

70 - throughout pre- and peri-conception period, pregnancy and early childhood (**pre- and peri-  
71 conception intervention package and enhanced antenatal, postnatal and early childhood care**)

72 at birth on low birth weight (LBW), preterm birth, small for gestational age (SGA), birth weight and length,  
73 and at 24 months on length for age z scores (LAZ) and stunting, compared to routine care.

74 To assess whether the effect of these interventions differs by maternal stature (<150 cm or ≥150 cm)

75

76 **Secondary Objectives**

77 To determine the effect of the package on nutritional status, morbidity and neurodevelopment in children

78 To determine the effect of the package on nutritional status and morbidity in the pre- and peri-conception,  
79 pregnancy and postpartum periods in women.

80

81 **Outcomes**

82 The preconception outcomes will be measured at the end of 18 months of follow up of preconception  
83 period or when the women will get pregnant. Outcomes in the pregnancy period will be measured at 26-  
84 28 and 35-37 weeks of gestation. Outcomes of children will be measured at birth or day 7 of life,  
85 1,3,5,6,9,12,15,18,21 and 24 months of age.

86 The primary outcomes at birth are proportion LBW (birth weight <2500 g); preterm birth (ultrasound-  
87 confirmed gestational age at birth < 37 completed weeks); SGA (birth weight centile <10<sup>th</sup> using  
88 INTERGROWTH-21st standards); mean birth weight and length At 24 months age, these are mean  
89 length-for-age z scores (LAZ) and proportion stunted.

90 The list of secondary outcomes along with the timing of measurements during the pre- and peri-  
91 conception, pregnancy and postnatal periods are provided below (Table 1 and 2).

92 The key secondary outcomes for children are proportion stunted at 6 and 12 months, wasted and  
93 underweight at 6, 12 and 24 months, weight, and length trajectories from birth to 24 months, body  
94 composition (in a subsample) at 1 month of age and neurodevelopment at 6, 12, 18 and 24 months (in a  
95 subsample), micronutrients and anemia status at 24 months, morbidity and hospitalization from birth to 24  
96 months The key secondary outcomes for women are micronutrient and anemia status, depressive  
97 symptoms and infections at the end of pre- and peri-conception, during pregnancy and postpartum  
98 period.

99 :

100

101 **Table 1. Secondary outcomes in women and timing of measurement**

|                                                                                          | Time Points                                            |                             |                             |                   |         |         |          |
|------------------------------------------------------------------------------------------|--------------------------------------------------------|-----------------------------|-----------------------------|-------------------|---------|---------|----------|
|                                                                                          | End of pre-conception period or reporting of pregnancy | Gestational age 26-28 weeks | Gestational age 35-36 weeks | At birth or day 7 | Month 2 | Month 6 | Month 12 |
| Birth interval                                                                           | ✓                                                      |                             |                             |                   |         |         |          |
| Body mass index                                                                          | ✓                                                      |                             |                             |                   |         | ✓       | ✓        |
| Weight Gain                                                                              |                                                        | ✓                           | ✓                           |                   |         |         |          |
| Symptoms of reproductive tract infections                                                | ✓                                                      |                             | ✓                           |                   |         |         |          |
| Depressive symptoms                                                                      | ✓                                                      |                             |                             |                   | ✓       |         | ✓        |
| Inflammatory markers (C-reactive protein, Alpha-acid glycoprotein) in a subsample        | ✓                                                      |                             | ✓                           |                   |         | ✓       |          |
| Micronutrient status (vitamin A, D, B12, zinc, iron, folate and selenium) in a subsample | ✓                                                      |                             | ✓                           |                   |         | ✓       |          |
| Anemia status                                                                            | ✓                                                      |                             | ✓                           |                   |         | ✓       |          |
| Thyroid status                                                                           | ✓                                                      |                             |                             |                   |         |         |          |
| Diabetes status                                                                          | ✓                                                      |                             |                             |                   |         |         |          |
| Postpartum morbidity                                                                     |                                                        |                             |                             | ✓                 |         |         |          |
| Pregnancy outcomes, still birth                                                          |                                                        |                             |                             | ✓                 |         |         |          |

102  
103  
104  
105  
106  
107  
108

109 **Table 2. Secondary outcomes in children and timing of measurement**

|                                                                                                      | Time points       |   |         |         |         |         |          |          |          |          |          |
|------------------------------------------------------------------------------------------------------|-------------------|---|---------|---------|---------|---------|----------|----------|----------|----------|----------|
|                                                                                                      | At birth or day 7 |   | Month 3 | Month 5 | Month 6 | Month 9 | Month 12 | Month 15 | Month 18 | Month 21 | Month 24 |
| Attained length (length-for- age z score)                                                            |                   |   |         |         | ✓       |         | ✓        |          |          |          |          |
| Attained weight (weight-for-age z score)                                                             |                   |   |         |         | ✓       |         | ✓        |          |          |          | ✓        |
| Stunted (length-for- age <-2 SD of the WHO Child Growth Standards)                                   |                   |   |         |         | ✓       |         | ✓        |          |          |          |          |
| Underweight (weight-for-age z score <-2 SD of the WHO Child Growth Standards)                        |                   |   |         |         | ✓       |         | ✓        |          |          |          | ✓        |
| Wasted (weight-for-height z score <-2 SD of the WHO Child Growth Standards)                          |                   |   |         |         | ✓       |         | ✓        |          |          |          | ✓        |
| Weight and length trajectories                                                                       | ✓                 | ✓ | ✓       | ✓       | ✓       | ✓       | ✓        | ✓        | ✓        | ✓        | ✓        |
| Head circumference                                                                                   | ✓                 |   |         |         |         |         | ✓        |          |          |          | ✓        |
| Mid-upper arm circumference                                                                          |                   |   |         |         | ✓       |         | ✓        |          |          |          | ✓        |
| Body composition in a sub sample                                                                     |                   | ✓ |         |         |         |         |          |          |          |          |          |
| Caregiver reported development outcomes in a sub sample                                              |                   |   |         |         |         |         | ✓        |          |          |          | ✓        |
| Cognitive, language and motor scores in a sub sample                                                 |                   |   |         |         |         |         |          |          |          |          | ✓        |
| Mother-infant bonding in a sub sample                                                                |                   |   |         |         | ✓       |         | ✓        |          | ✓        |          |          |
| Micronutrient status (vitamin A, D, B12, zinc, iron, folate and selenium) in a subsample             |                   |   |         |         |         |         |          |          |          |          | ✓        |
| Anemia status                                                                                        |                   |   |         |         |         |         |          |          |          |          | ✓        |
| Inflammatory markers: C-reactive protein, Alpha acid glycoprotein in a sub sample                    |                   |   |         |         |         |         |          |          |          |          | ✓        |
| Morbidity: Severe infection in neonatal period, 2 weeks prevalence of diarrhea, pneumonia, dysentery |                   | ✓ | ✓       |         | ✓       |         | ✓        |          | ✓        |          | ✓        |
| Hospitalizations                                                                                     |                   | ✓ | ✓       |         | ✓       |         | ✓        |          | ✓        |          | ✓        |
| Early initiation of breastfeeding                                                                    | ✓                 |   |         |         |         |         |          |          |          |          |          |
| Exclusive breastfeeding                                                                              |                   | ✓ |         | ✓       |         |         |          |          |          |          |          |
| Continued breastfeeding                                                                              |                   |   |         |         |         |         | ✓        |          | ✓        |          | ✓        |
| Complementary feeding: 24 dietary recalls in a sub sample                                            |                   |   |         |         |         | ✓       | ✓        |          | ✓        |          | ✓        |

110

111 **Adverse events**

112 Adverse events to supplements will be documented. The adverse events for this study are severe  
 113 allergic reactions to supplements, and deaths due to any cause which will be presented by study  
 114 groups.

115

116 **Sample size**

117 **Assumptions**

118 • All sample size calculations are based on 90% power and 95% confidence level except for  
 119 prematurity for which the power is 80%.

120 • The assumed effect sizes are larger for the combined effect of preconception, pregnancy and  
 121 early childhood interventions because of delivery of multiple interventions in which the individual  
 122 interventions have shown some evidence of impact.

123 • Available literature suggests that the largest impact of a single intervention during pregnancy  
 124 on mean difference in birth weight was ~50 g (0.1 SD), and reduction of LBW was~15% (1, 2). The  
 125 largest impact of a single intervention during pregnancy and/or post-natal period on mean difference  
 126 in attained length ~ 0.4 cm (0.1 SD) and reduction in stunting at 24 months of age ~15% (3). We  
 127 assumed at least 1.5 times higher effect size for the impact of either preconception or pregnancy and  
 128 early childhood interventions compared with control. We assumed at least 2 times higher effect size  
 129 for combined effect of preconception, pregnancy and early childhood interventions compared to  
 130 control.

131 **Table 3: Sample size matrix for effect of preconception interventions alone (A+B vs C+D) or**  
 132 **pregnancy and early childhood interventions alone (A+C vs B+D)**

|                                                                        | Main effect size                                                                              | Sample size per two groups |
|------------------------------------------------------------------------|-----------------------------------------------------------------------------------------------|----------------------------|
| Linear growth at 24 months<br>- Mean LAZ<br>- Proportion stunted (30%) | 0.15 SD (Absolute value 0.65 cm at 24 months)<br>25% relative reduction                       | 935<br>772                 |
| Birth weight/birth length<br>Proportion LBW (25%)                      | 0.15 SD (Absolute value 75 g birth weight and 0.35 cm birth length)<br>25% relative reduction | 935<br>918                 |
| Preterm birth (12%)                                                    | 25% relative reduction                                                                        | <b>2193</b>                |
| SGA at birth (36%)                                                     | 25% relative reduction                                                                        | 558                        |

133 **Table 4: Sample size matrix for combined effect of preconception, pregnancy and early**  
 134 **childhood interventions (A vs D)**

|                                                                        | Main effect size                                                                               | Sample size per group |
|------------------------------------------------------------------------|------------------------------------------------------------------------------------------------|-----------------------|
| Linear growth at 24 months<br>- Mean LAZ<br>- Proportion stunted (30%) | 0.20 SD (Absolute value 0.80 cm at 24 months)<br>30% relative reduction                        | 527<br>491            |
| Birth weight/birth length<br>Proportion LBW (25%)                      | 0.20 SD (Absolute value 100 g birth weight and 0.45 cm birth length)<br>30% relative reduction | 527<br>624            |
| Preterm birth (12%)                                                    | 30% relative reduction                                                                         | <b>1100</b>           |
| SGA at birth (36%)                                                     | 30% relative reduction                                                                         | 381                   |

135 We aim to get 1100 live births and 600 children in each group in each group (groups A, B, C, D)

136 The sample size of 2400 (600 children in each group) at 24 months will allow us to detect an  
 137 interaction odds ratio (IOR) of  $\geq 1.70$  to 1.85 in proportion of stunted children among short  
 138 mothers (height <150 cm) and proportion of stunted children among tall mothers ( $\geq$ height 150 cm)  
 139 between control (Routine care) and the full package intervention group with 80% power and 95%  
 140 confidence.

141 We propose to enroll and randomize a total of 13500 eligible women (6750 in preconception group  
 142 and 6750 in routine care group). Assuming 45% of women will get pregnant and randomized post  
 143 pregnancy and ~30% loss prior to second randomisation and 5% between pregnancy and live birth  
 144 (moving away, refusals, abortions, stillbirths, maternal deaths), we will have 1100 live births in each of  
 145 the four groups at birth. During the 2 years follow up, we are assuming a 20% loss (non-availability,  
 146 child deaths, refusals) and this will give us at least 600 children per group at 24 months.

147

148 **Sample size for neurodevelopment**

149 We calculated the sample size based on the assumption that pregnancy and early childhood  
 150 interventions (Group A+C) will lead to a 0.15 SD (2.25 points) increase in the neurodevelopment  
 151 scores assessed by BSID-III, compared to standard/no pregnancy and early childhood interventions  
 152 (B+D). We further assumed that combined preconception, pregnancy and early childhood  
 153 interventions (Group A) will lead to 0.20 SD (3.0 points) increase in the neurodevelopment scores  
 154 compared to control (Group D). All calculations done assuming ~10% refusals, power of 80% and  
 155 two-sided alpha of 0.05. We propose to conduct neurodevelopment assessments in the sample of  
 156 1712 children.

157

158 **Note on the neurodevelopment tools proposed to be used**

159 **Bayley Scales of Infant and Toddler Development (BSID), 3rd edition:** This is a comprehensive  
 160 assessment tool of developmental functioning in infants and toddlers aged 1-42 months. The tool is  
 161 directly administered to the child to assess cognitive, language and motor development whereas  
 162 socioemotional and adaptive behaviour is assessed using parent/caregiver completed rating scale.  
 163 The scores are reported either as scaled scores (mean 10, SD 3; range 1 to 19) or as composite  
 164 scores (mean 100, SD 15; range 40 to 160). The figure below shows the structure of the Bayley-III  
 165 tool.

166

167 **Figure 1. Bayley-III Structure**

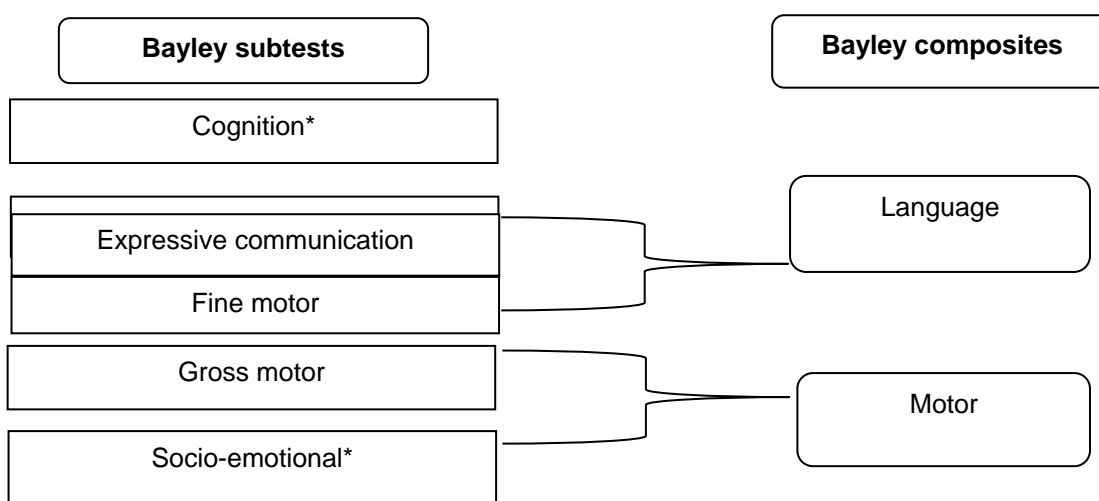

\*Composite score equivalents available

168



169

170

171 *Adaptation*

172 We have previously done adaptations, prior to using BSID-III, in similar study settings. For the  
173 adaptation, the test items were reviewed by the team of psychologists with respect to their cultural  
174 relevance. Subsequently, necessary modifications were identified, discussed and incorporated. While  
175 conducting the adaptations, care was taken to match the style of the original item. For items that  
176 required translation in the local language i.e., Hindi, the translation was done by psychologists fluent  
177 in the local language and with a thorough understanding of the cultural context. An individual that was  
178 not a part of the study team, performed the back-translation. The adapted materials were piloted on  
179 approximately 15–20 infants and children. Standardization exercises were conducted and the inter-  
180 rater agreement was excellent (Intraclass correlation, ICC ranged between 0.92-0.99).

181

182 **Ages and stages questionnaire (ASQ-3):** The Ages and Stages Questionnaire (ASQ-3) is a  
183 comprehensive parent-reported assessment tool that evaluates five key domains of child  
184 development: communication, gross motor, fine motor, problem-solving, and personal-social skills.  
185 This questionnaire is specifically designed to monitor and track developmental progress in children  
186 from birth up to 5 years of age. In the study, ASQ-3 assessments were conducted at the children's  
187 homes by a team of trained and standardized researchers. The assessment took place at two specific  
188 points in the child's life: once at 12 months and again at 24 months of age. The questionnaire contains  
189 age-appropriate questions tailored to each developmental domain, allowing parents to report on their  
190 child's skills and behaviors in communication, gross motor skills, fine motor skills, problem-solving  
191 abilities, and personal-social interactions. Each of the 5 domains has 6 questions where the mother is  
192 expected to answer "Yes", "No" or "Not Yet". 10 Points are given for "Yes"; 5 points for "No" and 0  
193 points for "Not Yet". The score obtained within each domain can range from 0 to 60.

194

195 **Mother-child bonding assessment:** Adapted version of the Observation of Mother Child Interaction  
196 (OMCI) tool developed by Rasheed and Yousafzai has been used to collect data on mother child  
197 interaction at 6, 12 and 18 months of child age. The tool consisted of questions pertaining to maternal  
198 and child behaviours. During the home visit for observing the interaction, the trained and standardized  
199 outcome team members counted each behaviour and then coded that behaviour as either 0: never  
200 occurred, 1: occurred infrequently (1–2 times), 2: sometimes occurred (3–4 times), or 3: occurred  
201 frequently (5+ times). A separate maternal and child score was calculated based on the responses for  
202 the items. The negative items were reverse coded so that higher scores reflected more positive and  
203 responsive mother-child interactions. Child and maternal scores were also combined to create a total  
204 score.

205

206 **Home Observation for Measurement of the Environment (HOME) inventory tool:** The quality of  
207 stimulation, support and opportunities for learning available for children at home was assessed  
208 through Home Observation for Measurement of the Environment (HOME) inventory tool. It has a set  
209 of 45 items, responses for which are either marked through observation or through interview with the

210 caregivers. The responses are coded as either 0 (not observed/reported during visit) and 1  
211 (observed/reported during visit). A higher attained overall score reflects better stimulation at home.  
212 Data collection is to be done by trained independent outcome team members through home visits.

213

## 214 **SECTION 2: STATISTICAL PRINCIPLES**

### 215 **Trial population**

216 Married women aged 18-30 years fulfilling the eligibility criteria and when they will become pregnant  
217 and are randomized again and their babies.

218

### 219 **Recruitment**

220 A CONSORT flow diagram will be used to summarise the following:

221• Number of women screened

222• Ineligible at screening with reasons

223• Eligible and randomised

224• Eligible but not randomised with reasons

225• Lost to follow-up

226 The numbers (with reasons) of losses to follow-up (drop-outs and withdrawals) over the course of the  
227 trial will be summarised by randomization group.

228

### 229 **Analysis population**

230 The primary analysis will be performed according to the intent-to-treat principle. The intention-to-treat  
231 population will include all randomised participants according to the intervention they were randomised  
232 to receive.

233

### 234 **Primary comparisons**

235 We will conduct three pre-specified comparisons for all primary and secondary outcomes;

236 1. Effect of preconception interventions: groups that received preconception interventions (A+B)  
237 compared to the groups that did not receive preconception interventions (C+D)

238 2. Effect of pregnancy and early childhood interventions: groups that received pregnancy and early  
239 childhood interventions (A+C) compared to the groups that did not receive pregnancy and early  
240 childhood interventions (B+D)

241 3. Effect of combined preconception, pregnancy and early childhood interventions: group that  
242 received interventions during preconception, pregnancy and early childhood (A) compared to the  
243 control group (D)

244

### 245 **Interaction assessment for factorial design**

246 We will examine for interaction between the intervention package delivered during preconception and  
247 during pregnancy and early childhood periods on primary outcomes at birth and 24 months. We will  
248 create two dummy variables for receiving preconception interventions (0=No, 1=Yes) and pregnancy  
249 and early childhood interventions (0=No, 1=Yes). We will include a multiplicative interaction term of  
250 these two variables in the generalized linear model to assess the interaction between two intervention  
251 groups. Interaction will be significant if the p value of interaction term will be <0.05.

252

253

254 **Comparability of participants across the groups**

255 We will compare means, and proportions by different groups to check whether the randomization  
256 schemes resulted in comparability of different groups. Characteristics both at first and second  
257 randomization will be compared to check imbalances across the groups. We will present mean age of  
258 women, mean height of women, proportion of women with height <150 cm, women education, women  
259 occupation, religion, wealth index of the household, women BMI, family having BPL card, family  
260 having health insurance, and place of birth. As per the Consolidated Standards of Reporting Trials  
261 (CONSORT) guidelines, we will not perform significance tests to compare baseline characteristics  
262 among the intervention groups. Characteristics with a 20-25% relative difference between groups  
263 will be adjusted in the final model.

264

265 **Main effects**

266 We will use generalized linear models of the Poisson family with a log-link function for binary  
267 outcomes to calculate incidence rate ratio (IRR). Generalized linear models of gaussian family with an  
268 identity-link function will be used for continuous outcomes to calculate mean difference (MD). The  
269 final models will be adjusted for potential confounders.

270 We will also display comparisons of individual groups and assess interaction between preconception  
271 interventions and pregnancy and early childhood interventions for all primary outcomes.

272 LAZ and WAZ scores from birth to 24 months will be created using Kernel weighted local polynomial  
273 smoothing technique (a natural extension of the local mean smoothing of Nadaraya–Watson, local  
274 polynomial regression involves fitting the response to a polynomial form of the regressor via locally  
275 weighted least squares) for all three comparisons.

276 We will also estimate absolute risk reduction and their 98.3% confidence intervals for categorical  
277 primary and secondary outcomes at birth and at 24 months.

278

279 **Adjustment for multiplicity**

280 We will use 98.3% confidence intervals of effect sizes for all primary and secondary outcomes to  
281 adjust for the three primary comparisons (significance level 0.05/3 or 0.017).

282 The study has multiple primary outcomes related to low birthweight (proportion LBW, SGA and  
283 preterm, and mean birth weight and length) and stunting (proportion stunted and mean length for age  
284 z-score at 24 months of age). Our *a priori* decision is not to adjust for multiple primary outcomes  
285 because the primary outcomes are likely to be correlated, we are not addressing a universal null  
286 hypothesis, and that formal adjustments for multiplicity are unlikely to enhance interpretation (4).

287 However, we will conduct a *post-hoc* sensitivity analysis where we will adjust p values for multiple  
288 primary outcomes using the Holm-Bonferroni method (5). In this sensitivity analysis, we will adjust  
289 for a total of 21 comparisons; seven primary outcomes (five at birth and two at 24 months) and three  
290 two-group comparisons.

291 All summary statistics will be rounded presented to one decimal precision of the raw values, except  
292 for the minimum and maximum values. These values will be presented with the same decimal  
293 precision as the raw values and SD will be presented to 2 but if too small then to 3 decimal precisions  
294 than the raw value. P-values will be presented to 3 decimal precisions.

295

296 **Missing Data**

297 We will include all subjects in the analysis irrespective of duration or compliance to intervention,  
298 provided the outcome data are available for primary outcomes. No imputation will be made for the  
299 primary outcomes.

300

301 **Adherence**

302 Compliance will be assessed for all interventions periodically during all periods; preconception,  
303 pregnancy , postnatal and childhood . Compliance to nutritional interventions will be assessed based

304 on the percent days the intervention i.e., Iron folic acid tablets, multiple micronutrients, snacks, milk or  
 305 egg was consumed. It will be defined as:  
 306 % compliance = (number of IFA tablets taken / number of IFA tablets supposed to have been taken)  
 307 \*100%.  
 308 The number of IFA tablets supposed to have been taken will be calculated for the duration of  
 309 intervention (end of study intervention – start of study intervention).  
 310 It will be summarised as descriptive statistics median, IQR) or mean (SD)  
 311 The compliance to health, psychosocial intervention will be presented as proportion screened and  
 312 proportion treated.

313

314 **Definitions used for analysis**

| <b>Outcome</b>                       | <b>Definition</b>                                                                                                                                                                                                     |
|--------------------------------------|-----------------------------------------------------------------------------------------------------------------------------------------------------------------------------------------------------------------------|
| Birth weight                         | Weight measured by study team on day 7 (up to + 6 days)                                                                                                                                                               |
| Birth length                         | Length measured by study team on days 1-7 (up to + 6 days)                                                                                                                                                            |
| Low birth weight                     | Birth weight <2500g                                                                                                                                                                                                   |
| Preterm birth                        | Ultrasound confirmed gestational age at birth <37 weeks                                                                                                                                                               |
| Small for gestational age            | Birth weight <10 <sup>th</sup> centile according to intergrowth standards-21                                                                                                                                          |
| Length-for-age z score               | Calculated based on length measured on days 1-7 (up to + 6 days) and at 6,12,24 months (up to 12 weeks)                                                                                                               |
| Stunted                              | Length for age z score <-2SD by WHO Child Growth Standards                                                                                                                                                            |
| Gestational age                      | Calculated using crown to rump length (CRL) measured according to intergrowth standards if CRL is >15mm and <95mm.<br>If CRL >95mm then head circumference and femur length will be used.                             |
| Spontaneous preterm                  | Spontaneous onset of labour before 37 completed weeks of gestation with intact membranes, without intervention from the caregiver.                                                                                    |
| Head circumference                   | Head circumference measured by study team on day 7 (up to + 6 days) and at 6,12, 24 months (up to 12 weeks)                                                                                                           |
| Stillbirth                           | A baby who dies after 28 weeks of gestation, but before or during birth.                                                                                                                                              |
| Weight-for-length z score            | Calculated based on weight and length measured at 6,12, 24 months (up to 12 weeks)                                                                                                                                    |
| Weight-for-age z score               | Calculated based on weight measured at 6,12, 24 months (up to 12 weeks)                                                                                                                                               |
| Wasted                               | Weight-for-length z score <-2SD by WHO Child Growth Standards                                                                                                                                                         |
| Underweight                          | Weight-for-age z score <-2SD by WHO Child Growth Standards                                                                                                                                                            |
| Mid-upper arm circumference          | Mid-upper arm circumference measured by study team at 6,12, 24 months (up to 12 weeks)                                                                                                                                |
| Gestational weight gain              | Weight gain from second randomization (pregnancy confirmation) to 26-28 weeks and 35-37 weeks of gestation                                                                                                            |
| Exclusive breastfeeding              | No other food or drink, not even water, except breast milk (including milk expressed or from a wet nurse), but allows the infant to receive ORS, drops and syrups (vitamins, minerals and medicines) in last 24 hours |
| Continued breastfeeding              | Breastfeeding continued till 12 months of age                                                                                                                                                                         |
| Possible serious bacterial infection | Reported one of the following – not able to breastfeed or feed, fever, cold to touch, lethargy or unconscious or convulsions or fast or difficult breathing or pneumonia (local term)                                 |
| Local infection                      | Presence of skin infection or discharge from eyes or ears                                                                                                                                                             |
| Diarrhea                             | Reported by mother or caregiver<br>Symptoms of dehydration and dysentery: Not able to drink, lethargy or unconsciousness, restlessness or irritability and sunken eyes; dysentery: blood in stool                     |
| Pneumonia                            | History of cough reported by the mother or difficult breathing or chest indrawing                                                                                                                                     |
| Severe pneumonia                     | Pneumonia with one or more of the following danger signs – not able to                                                                                                                                                |

| Outcome                                     | Definition                                                                                                                                                                                                                                                                                                                                                                                                                                                                                       |
|---------------------------------------------|--------------------------------------------------------------------------------------------------------------------------------------------------------------------------------------------------------------------------------------------------------------------------------------------------------------------------------------------------------------------------------------------------------------------------------------------------------------------------------------------------|
|                                             | breastfeed or feed, fever, cold to touch, lethargy or unconsciousness or convulsions or stridor                                                                                                                                                                                                                                                                                                                                                                                                  |
| Reproductive tract infection                | Any symptoms of vaginal discharge, itching, burning, swelling, ulcer in genital region, swelling and pain lower abdomen                                                                                                                                                                                                                                                                                                                                                                          |
| Hypothyroidism                              | Preconception: TSH >5.5 mIU/ml; Pregnancy: TSH ≥4.0 mIU/ml                                                                                                                                                                                                                                                                                                                                                                                                                                       |
| Pre-diabetes or diabetes                    | HbA1c >5.7%                                                                                                                                                                                                                                                                                                                                                                                                                                                                                      |
| Hypertension                                | systolic blood pressure ≥140 mmHg and/or diastolic blood pressure ≥90 mmHg                                                                                                                                                                                                                                                                                                                                                                                                                       |
| Anemia                                      | Preconception: Mild anemia: Hb 10 to 11.99 g/dL, Moderate anemia: Hb 8 to 9.99 g/dL, Severe anemia: Hb <8g/dL<br>Pregnancy: Mild Anemia: hemoglobin 10-10.99 g/dL, Moderate Anemia: hemoglobin 7-9.99 g/dL, Severe Anemia: hemoglobin <7 g/dL<br>Postnatal mother: Mild anemia: Hb 10 to 11.99 g/dL, Moderate anemia: Hb 8 to 9.99 g/dL, Severe anemia: Hb <8g/dL<br>Children: Mild Anemia: hemoglobin 10-10.99 g/dL, Moderate Anemia: hemoglobin 7-9.99 g/dL, Severe Anemia: hemoglobin <7 g/dL |
| Months between previous birth to pregnancy  | Interval (in months) between previous birth to current pregnancy                                                                                                                                                                                                                                                                                                                                                                                                                                 |
| Months between marriage to pregnancy        | Interval (in months) between marriage to current pregnancy                                                                                                                                                                                                                                                                                                                                                                                                                                       |
| Depressive symptoms                         | PHQ-9 score ≥10 or suicidal ideation                                                                                                                                                                                                                                                                                                                                                                                                                                                             |
| Moderate to severe neurodevelopmental delay | Composite score of less than 85 on BSID-III assessment- for each of the domains i.e., cognition, motor, language and socio-emotional                                                                                                                                                                                                                                                                                                                                                             |
| Antepartum hemorrhage                       | Reported excessive bleeding from vagina occurring any time during pregnancy, before delivery that wet her clothes                                                                                                                                                                                                                                                                                                                                                                                |
| Preeclampsia/ Eclampsia                     | Preeclampsia: Measured diastolic blood pressure ≥90 mmHg and/or systolic blood pressure ≥140 mmHg and proteinuria (by dipstick1-4+), Eclampsia: Preclampsia with convulsions before, during or after pregnancy                                                                                                                                                                                                                                                                                   |
| Postpartum hemorrhage                       | Reported excessive bleeding after delivery, with or without loss of consciousness                                                                                                                                                                                                                                                                                                                                                                                                                |

315

### 316 Subgroup Analysis

317 We will conduct pre-specified sub-group analysis according to women's height (< 150 cm and ≥ 150  
318 cm), BMI status at enrolment and at the time of pregnancy confirmation (<18.5, 18.5 to 24.99 and ≥25  
319 to 29.99 and ≥30 kg/m<sup>2</sup> (based on WHO classification of BMI), years of education (1-5, 6-11, 12-14,  
320 ≥15 years), high risk pregnancy and wealth quintile of the household. The relative measures of effect  
321 within each of these subgroups will be presented as forest plots for three pre-specified primary  
322 comparisons for primary outcomes at birth and 24 months. High risk pregnancy will be defined if a  
323 woman has any of the following condition at the time of confirmation of pregnancy; moderate or  
324 severe anemia or symptoms of reproductive tract infections or hypertension, or hypothyroidism or  
325 diabetes or moderate to severe depressive symptoms (PHQ-9 score ≥10 or suicidal ideation) or  
326 history of previous preterm birth, intrauterine deaths, lower segment caesarean section. We will use  
327 generalized linear models as used for primary outcomes to assess the intervention effect.

328 All analysis will be conducted using STATA, version 16.

329

### 330 Data Safety Monitoring Committee (DSMC)

331 The Data Safety Monitoring Committee (DSMC) will be a technical body constituted by the WHO with  
332 members who have expertise in epidemiology, paediatrics, nutrition, community health and statistics.  
333 DSMC will be responsible for safeguarding the interests of study participants, investigators and  
334 funders, assessing the safety and early efficacy of study interventions according to data available at a

335 predefined schedule, monitoring the study overall conduct and quality and protecting its validity and  
336 credibility and making recommendations concerning continuation/terminate of study.  
337 The DSMC will conduct one interim analysis when 50% of sample size for primary outcomes will be  
338 achieved. The two sets of primary outcomes will be assessed at different time points, at birth and at  
339 24 months. The DSMC will use prespecified conservative O'Brien-Fleming stopping rule ( $P < 0.001$ ) for  
340 early efficacy to have minimum impact on type 1 error in the final analysis (6).

341

342 **Dummy figures and tables**

343 The dummy figures and tables of CONSORT flow diagram, baseline characteristics of enrolled  
344 women at first and second randomization, pre-specified comparisons of primary and secondary  
345 outcomes at birth and 24 months, and compliance to interventions during preconception, pregnancy,  
346 post-natal and early childhood periods are given below. Other secondary outcomes will be presented  
347 in similar way.

348

349

350

351 **Figure X. Screening, enrollment, randomization and follow up**

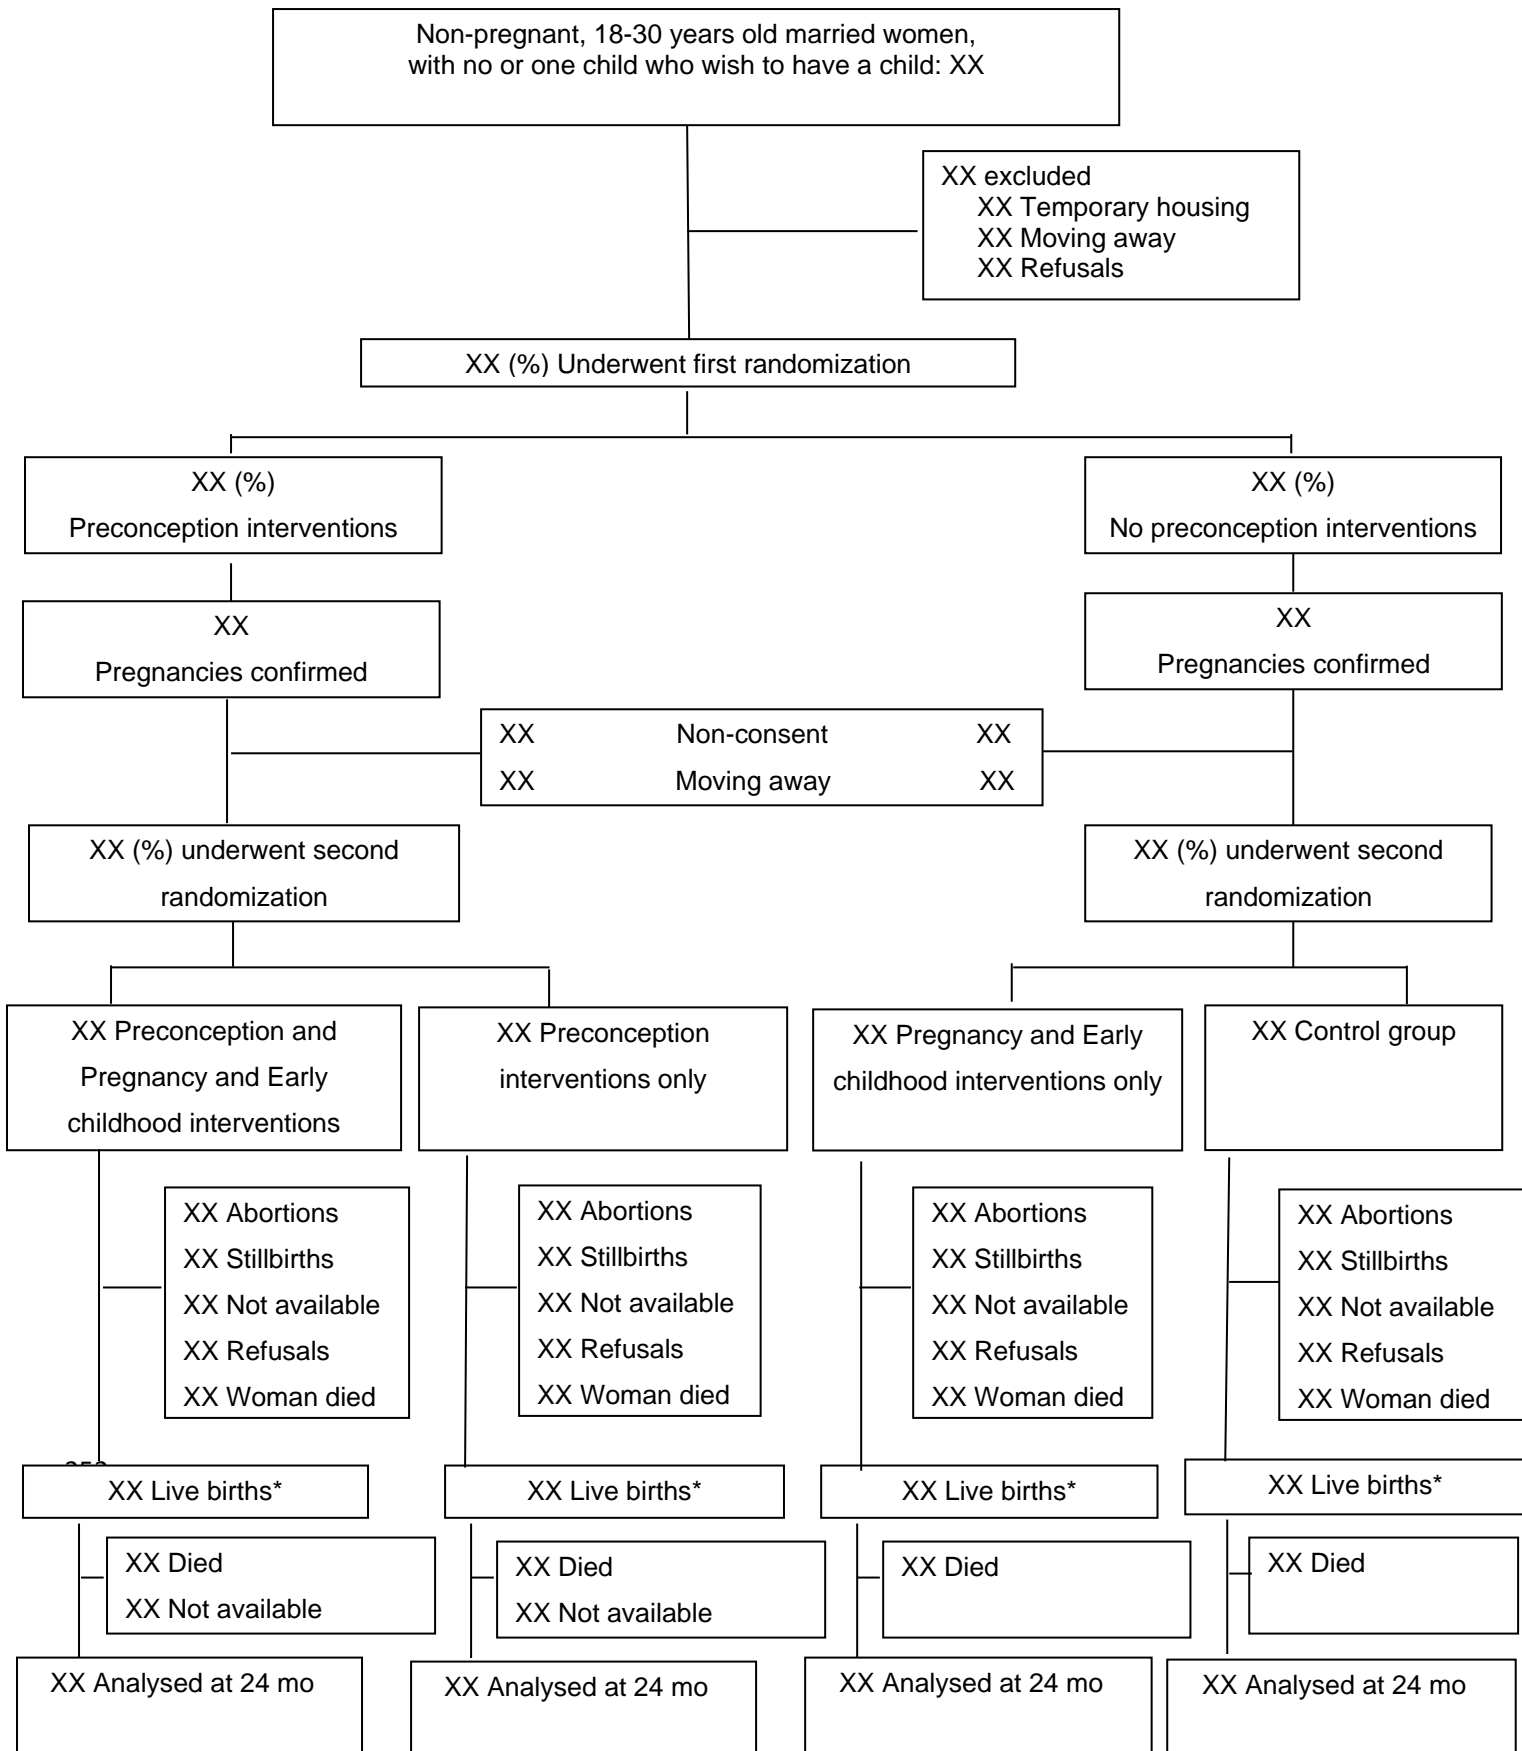

\*X twins

Table X. Baseline characteristics of enrolled women at first and second randomization

| Characteristics at enrolment                      | First randomization               |                                      | Second randomization                                                        |                                                   |                                                                   |                                |
|---------------------------------------------------|-----------------------------------|--------------------------------------|-----------------------------------------------------------------------------|---------------------------------------------------|-------------------------------------------------------------------|--------------------------------|
|                                                   | Preconception interventions<br>N= | No Preconception interventions<br>N= | Preconception, pregnancy and early childhood interventions<br>Group A<br>N= | Preconception interventions only<br>Group B<br>N= | Pregnancy and early childhood interventions only<br>Group C<br>N= | Control group<br>Group D<br>N= |
| Mean (SD) Age of women – yr                       |                                   |                                      |                                                                             |                                                   |                                                                   |                                |
| Mean (SD) Height of women – cm                    |                                   |                                      |                                                                             |                                                   |                                                                   |                                |
| Height <150 cm – n (%)                            |                                   |                                      |                                                                             |                                                   |                                                                   |                                |
| BMI category (kg/m <sup>2</sup> ) – n (%)         |                                   |                                      |                                                                             |                                                   |                                                                   |                                |
| ≥25                                               |                                   |                                      |                                                                             |                                                   |                                                                   |                                |
| 18.5 to 24.99                                     |                                   |                                      |                                                                             |                                                   |                                                                   |                                |
| <18.5                                             |                                   |                                      |                                                                             |                                                   |                                                                   |                                |
| Joint or extended family* – n (%)                 |                                   |                                      |                                                                             |                                                   |                                                                   |                                |
| Women schooling ≥12 yr – n (%)                    |                                   |                                      |                                                                             |                                                   |                                                                   |                                |
| Homemaker – n (%)                                 |                                   |                                      |                                                                             |                                                   |                                                                   |                                |
| Family has below poverty line card – n (%)        |                                   |                                      |                                                                             |                                                   |                                                                   |                                |
| Family covered by health insurance scheme – n (%) |                                   |                                      |                                                                             |                                                   |                                                                   |                                |
| Place of births <sup>‡</sup> – n (%)              |                                   |                                      |                                                                             |                                                   |                                                                   |                                |
| Large hospitals                                   |                                   |                                      |                                                                             |                                                   |                                                                   |                                |
| Small hospitals or birthing centres               |                                   |                                      |                                                                             |                                                   |                                                                   |                                |
| Home births                                       |                                   |                                      |                                                                             |                                                   |                                                                   |                                |
| Twins – n (%)                                     |                                   |                                      |                                                                             |                                                   |                                                                   |                                |

354 \* Joint or extended family: Adult relatives other than the enrolled woman's husband and children living together in a household

355

356

357

358



359 **Table X. Pre-specified comparisons of primary and secondary outcomes at birth**

| Outcomes                            | Group A<br>n=1290 | Group B<br>n=1276 | Group C<br>n=1093 | Group D<br>n=1093 | Preconception intervention groups vs no preconception intervention groups<br>A+B vs C+D |                          | Pregnancy intervention groups vs no pregnancy intervention group<br>A+C vs B+D |                          | Preconception and pregnancy intervention groups vs no preconception and pregnancy intervention group<br>A vs D |                        |
|-------------------------------------|-------------------|-------------------|-------------------|-------------------|-----------------------------------------------------------------------------------------|--------------------------|--------------------------------------------------------------------------------|--------------------------|----------------------------------------------------------------------------------------------------------------|------------------------|
|                                     |                   |                   |                   |                   | IRR<br>(98.3%)                                                                          | ARR (%) or MD<br>(98.3%) | IRR<br>(98.3%)                                                                 | ARR (%) or MD<br>(98.3%) | IRR<br>(98.3%)                                                                                                 | ARR (%) or MD<br>98.3% |
| <b>Primary</b>                      |                   |                   |                   |                   |                                                                                         |                          |                                                                                |                          |                                                                                                                |                        |
| LBW <sup>†</sup>                    |                   |                   |                   |                   |                                                                                         |                          |                                                                                |                          |                                                                                                                |                        |
| Preterm <sup>†</sup>                |                   |                   |                   |                   |                                                                                         |                          |                                                                                |                          |                                                                                                                |                        |
| SGA <sup>†</sup>                    |                   |                   |                   |                   |                                                                                         |                          |                                                                                |                          |                                                                                                                |                        |
| Birth weight, g <sup>‡</sup>        |                   |                   |                   |                   |                                                                                         |                          |                                                                                |                          |                                                                                                                |                        |
| Birth length, cm <sup>§‡</sup>      |                   |                   |                   |                   |                                                                                         |                          |                                                                                |                          |                                                                                                                |                        |
| <b>Secondary</b>                    |                   |                   |                   |                   |                                                                                         |                          |                                                                                |                          |                                                                                                                |                        |
| Spontaneous preterm <sup>†</sup>    |                   |                   |                   |                   |                                                                                         |                          |                                                                                |                          |                                                                                                                |                        |
| Stunting <sup>†</sup>               |                   |                   |                   |                   |                                                                                         |                          |                                                                                |                          |                                                                                                                |                        |
| Head circumference, cm <sup>‡</sup> |                   |                   |                   |                   |                                                                                         |                          |                                                                                |                          |                                                                                                                |                        |
| Stillbirths <sup>†</sup>            |                   |                   |                   |                   |                                                                                         |                          |                                                                                |                          |                                                                                                                |                        |

360  
361 <sup>†</sup>Adjusted incidence rate ratio (IRR), <sup>§</sup>Adjusted mean difference or absolute risk reduction adjusted for potential confounders  
362

363 **Group A:** Preconception, pregnancy and early childhood intervention; **Group B:** Only preconception intervention; **Group C:** Only pregnancy and early childhood  
364 intervention; **Group D:** Control  
365

366 **Group A+B vs Group C+D:** Effect of preconception interventions: women who received interventions compared with those who did not receive preconception  
367 interventions; **Group A+C vs Group B+D:** Effect of pregnancy and early childhood interventions: women who received these interventions compared with those  
368 who did not receive these interventions; **Group A vs Group D:** Effect of preconception, pregnancy and early childhood interventions: women who received  
369 interventions in these periods compared with those who received routine care  
370

371  
372

373 **Table X. Primary and secondary anthropometry outcomes at 24 months of age**

| Outcomes                                    | Group A<br>n=453 | Group B<br>n=439 | Group C<br>n=293 | Group D<br>n=271 | Preconception intervention groups vs no preconception intervention groups<br>A+B vs C+D |                          | Pregnancy intervention groups vs no pregnancy intervention group<br>A+C vs B+D |                          | Preconception and pregnancy intervention groups vs no preconception and pregnancy intervention group<br>A vs D |                          |
|---------------------------------------------|------------------|------------------|------------------|------------------|-----------------------------------------------------------------------------------------|--------------------------|--------------------------------------------------------------------------------|--------------------------|----------------------------------------------------------------------------------------------------------------|--------------------------|
|                                             |                  |                  |                  |                  | IRR<br>(98.3%)                                                                          | ARR (%) or MD<br>(98.3%) | IRR<br>(98.3%)                                                                 | ARR (%) or MD<br>(98.3%) | IRR<br>(98.3%)                                                                                                 | ARR (%) or MD<br>(98.3%) |
| <b>Primary outcomes</b>                     |                  |                  |                  |                  |                                                                                         |                          |                                                                                |                          |                                                                                                                |                          |
| Mean (SD) length-for-age z score            |                  |                  |                  |                  |                                                                                         |                          |                                                                                |                          |                                                                                                                |                          |
| Stunted – n (%) <sup>†</sup>                |                  |                  |                  |                  |                                                                                         |                          |                                                                                |                          |                                                                                                                |                          |
| <b>Secondary outcomes</b>                   |                  |                  |                  |                  |                                                                                         |                          |                                                                                |                          |                                                                                                                |                          |
| Mean (SD) weight-for-length z score         |                  |                  |                  |                  |                                                                                         |                          |                                                                                |                          |                                                                                                                |                          |
| Wasted – n (%) <sup>†</sup>                 |                  |                  |                  |                  |                                                                                         |                          |                                                                                |                          |                                                                                                                |                          |
| Mean (SD) weight-for-age z score*           |                  |                  |                  |                  |                                                                                         |                          |                                                                                |                          |                                                                                                                |                          |
| Underweight – n (%) <sup>†</sup>            |                  |                  |                  |                  |                                                                                         |                          |                                                                                |                          |                                                                                                                |                          |
| Mean (SD) mid-upper arm circumference – cm* |                  |                  |                  |                  |                                                                                         |                          |                                                                                |                          |                                                                                                                |                          |
| Mean (SD) head circumference – cm*          |                  |                  |                  |                  |                                                                                         |                          |                                                                                |                          |                                                                                                                |                          |

374 Adjusted mean difference (MD), Absolute risk reduction (ARR). <sup>†</sup>Adjusted Incidence rate ratio (IRR), adjusted for potential confounders

375 **Group A:** Preconception, pregnancy and early childhood intervention; **Group B:** Only preconception intervention; **Group C:** Only pregnancy and early childhood  
376 intervention; **Group D:** Control

377

378 **Group A+B vs Group C+D:** Effect of preconception interventions: women who received interventions compared with those who did not receive preconception  
379 interventions; **Group A+C vs Group B+D:** Effect of pregnancy and early childhood interventions: women who received these interventions compared with those  
380 who did not receive these interventions; **Group A vs Group D:** Effect of preconception, pregnancy and early childhood interventions: women who received  
381 interventions in these periods compared with those who received routine care

382

383

384

385

386 **Table X . Neurodevelopment outcomes assessed by BSID-III and ASQ-3 at 24 months of age**

| Outcomes                        | Group A (n=) | Group B (n=) | Group C (n=) | Group D (n=) | Preconception intervention groups vs no preconception intervention groups A+B vs C+D | Pregnancy intervention groups vs no pregnancy intervention group A+C vs B+D | Preconception and pregnancy intervention groups vs no preconception and pregnancy intervention group A vs D |
|---------------------------------|--------------|--------------|--------------|--------------|--------------------------------------------------------------------------------------|-----------------------------------------------------------------------------|-------------------------------------------------------------------------------------------------------------|
|                                 |              |              |              |              | MD (98.3% CI) †                                                                      | MD (98.3% CI) †                                                             | MD (98.3% CI) †                                                                                             |
| <b>BSID-III composite score</b> |              |              |              |              |                                                                                      |                                                                             |                                                                                                             |
| Cognitive                       |              |              |              |              |                                                                                      |                                                                             |                                                                                                             |
| Language                        |              |              |              |              |                                                                                      |                                                                             |                                                                                                             |
| Motor                           |              |              |              |              |                                                                                      |                                                                             |                                                                                                             |
| Socio-emotional                 |              |              |              |              |                                                                                      |                                                                             |                                                                                                             |
| <b>ASQ-3 score</b>              |              |              |              |              |                                                                                      |                                                                             |                                                                                                             |
| Communication                   |              |              |              |              |                                                                                      |                                                                             |                                                                                                             |
| Gross motor                     |              |              |              |              |                                                                                      |                                                                             |                                                                                                             |
| Fine motor                      |              |              |              |              |                                                                                      |                                                                             |                                                                                                             |
| Problem solving                 |              |              |              |              |                                                                                      |                                                                             |                                                                                                             |
| Personal social                 |              |              |              |              |                                                                                      |                                                                             |                                                                                                             |

387 BSID-III: Bayley Scales of Infant and Toddler Development, 3<sup>rd</sup> edition; ASQ-3: Ages and Stages Questionnaire, 3<sup>rd</sup> edition; †Adjusted mean difference (MD)  
388 (98.3% CI), adjusted for potential confounders

389 **Group A:** Preconception, pregnancy and early childhood intervention; **Group B:** Only preconception intervention; **Group C:** Only pregnancy and early childhood  
390 intervention; **Group D:** Control

391 **Group A+B vs Group C+D:** Effect of preconception interventions: women who received interventions compared with those who did not receive preconception  
392 interventions; **Group A+C vs Group B+D:** Effect of pregnancy and early childhood interventions: women who received these interventions compared with those  
393 who did not receive these interventions; **Group A vs Group D:** Effect of preconception, pregnancy and early childhood interventions: women who received  
394 interventions in these periods compared with those who received routine care

395

396

397

398

399

400 **Table X. Neurodevelopment outcomes at 12 months assessed by ASQ-3, mother child bonding and child stimulation scores**

| Outcomes                                 | Group A<br>(n=) | Group B<br>(n=) | Group C<br>(n=) | Group D<br>(n=) | Preconception<br>intervention groups<br>vs no preconception<br>intervention groups<br>A+B vs C+D | Pregnancy<br>intervention groups<br>vs no pregnancy<br>intervention group<br>A+C vs B+D | Preconception and pregnancy<br>intervention groups vs no<br>preconception and pregnancy<br>intervention group<br>A vs D |
|------------------------------------------|-----------------|-----------------|-----------------|-----------------|--------------------------------------------------------------------------------------------------|-----------------------------------------------------------------------------------------|-------------------------------------------------------------------------------------------------------------------------|
|                                          |                 |                 |                 |                 | MD (98.3% CI) <sup>‡</sup>                                                                       | MD (98.3% CI) <sup>‡</sup>                                                              | MD (98.3% CI) <sup>‡</sup>                                                                                              |
| <b>ASQ-3 score</b>                       |                 |                 |                 |                 |                                                                                                  |                                                                                         |                                                                                                                         |
| Communication                            |                 |                 |                 |                 |                                                                                                  |                                                                                         |                                                                                                                         |
| Gross motor                              |                 |                 |                 |                 |                                                                                                  |                                                                                         |                                                                                                                         |
| Fine motor                               |                 |                 |                 |                 |                                                                                                  |                                                                                         |                                                                                                                         |
| Problem solving                          |                 |                 |                 |                 |                                                                                                  |                                                                                         |                                                                                                                         |
| Personal social                          |                 |                 |                 |                 |                                                                                                  |                                                                                         |                                                                                                                         |
| <b>Mother child bonding score (OMCI)</b> |                 |                 |                 |                 |                                                                                                  |                                                                                         |                                                                                                                         |
| At 6 months                              |                 |                 |                 |                 |                                                                                                  |                                                                                         |                                                                                                                         |
| At 12 months                             |                 |                 |                 |                 |                                                                                                  |                                                                                         |                                                                                                                         |
| At 18 months                             |                 |                 |                 |                 |                                                                                                  |                                                                                         |                                                                                                                         |
| <b>HOME score at 24 mo</b>               |                 |                 |                 |                 |                                                                                                  |                                                                                         |                                                                                                                         |

401 ASQ-3: Ages and Stages Questionnaire, 3<sup>rd</sup> edition;402 <sup>‡</sup>Model adjusted for potential confounders; OMCI - observation of mother-child interaction tool403 **Group A:** Preconception, pregnancy and early childhood intervention; **Group B:** Only preconception intervention; **Group C:** Only pregnancy and early childhood  
404 intervention; **Group D:** Control405 **Group A+B vs Group C+D:** Effect of preconception interventions: women who received interventions compared with those who did not receive preconception  
406 interventions; **Group A+C vs Group B+D:** Effect of pregnancy and early childhood interventions: women who received these interventions compared with those  
407 who did not receive these interventions; **Group A vs Group D:** Effect of preconception, pregnancy and early childhood interventions: women who received  
408 interventions in these periods compared with those who received routine care

409

410

411

412

413

414

415 **Table X. Risk of neurodevelopmental delay in children aged 24 months of age across the study groups**

| Outcomes        | Group A<br>(n=) | Group B<br>(n=) | Group C<br>(n=) | Group D<br>(n=) | Preconception intervention<br>groups vs no preconception<br>intervention groups<br>A+B vs C+D |                         | Pregnancy intervention<br>groups vs no pregnancy<br>intervention group<br>A+C vs B+D |                         | Preconception and<br>pregnancy intervention<br>groups vs no<br>preconception and<br>pregnancy intervention<br>group<br>A vs D |                         |
|-----------------|-----------------|-----------------|-----------------|-----------------|-----------------------------------------------------------------------------------------------|-------------------------|--------------------------------------------------------------------------------------|-------------------------|-------------------------------------------------------------------------------------------------------------------------------|-------------------------|
|                 |                 |                 |                 |                 | IRR<br>(98.3% CI) †                                                                           | ARR (%)<br>(98.3% CI) † | IRR<br>(98.3% CI) †                                                                  | ARR (%)<br>(98.3% CI) † | IRR<br>(98.3% CI) †                                                                                                           | ARR (%)<br>(98.3% CI) † |
| Cognitive       |                 |                 |                 |                 |                                                                                               |                         |                                                                                      |                         |                                                                                                                               |                         |
| Language        |                 |                 |                 |                 |                                                                                               |                         |                                                                                      |                         |                                                                                                                               |                         |
| Motor           |                 |                 |                 |                 |                                                                                               |                         |                                                                                      |                         |                                                                                                                               |                         |
| Socio-emotional |                 |                 |                 |                 |                                                                                               |                         |                                                                                      |                         |                                                                                                                               |                         |

416

417 BSID-III- Bayley Scales of Infant and Toddler Development, 3<sup>rd</sup> Edition; † adjusted for potential confounders; IRR-Incidence Rate Ratio; ARR- Absolute Risk  
418 Reduction; neurodevelopmental delay defined as composite score of less than 85 on BSID-III assessment

419 **Group A:** Preconception, pregnancy and early childhood intervention; **Group B:** Only preconception intervention; **Group C:** Only pregnancy and early childhood  
420 intervention; **Group D:** Control

421 **Group A+B vs Group C+D:** Effect of preconception interventions: women who received interventions compared with those who did not receive preconception  
422 interventions; **Group A+C vs Group B+D:** Effect of pregnancy and early childhood interventions: women who received these interventions compared with those  
423 who did not receive these interventions; **Group A vs Group D:** Effect of preconception, pregnancy and early childhood interventions: women who received  
424 interventions in these periods compared with those who received routine care  
425

426

427

428

429

430

431

432

433

434

435 **Table X. Compliance to interventions during the preconception period**

|                                                                                                        | At Enrollment                 |                       | At 12 month            |
|--------------------------------------------------------------------------------------------------------|-------------------------------|-----------------------|------------------------|
| <b>SCREENING AND TREATMENT</b>                                                                         |                               |                       |                        |
| <b>HEALTH</b>                                                                                          |                               |                       |                        |
| <b>Hypothyroidism</b>                                                                                  |                               |                       |                        |
| Proportion screened (TSH), – n/total (%)                                                               |                               |                       |                        |
| Proportion with hypothyroidism prescribed treatment – n/total (%)                                      |                               |                       |                        |
| <b>Pre-diabetes or diabetes</b>                                                                        |                               |                       |                        |
| Proportion screened (HbA1c) – n/total (%)                                                              |                               |                       |                        |
| Proportion with pre-diabetes or diabetes prescribed treatment – n/total (%)                            |                               |                       |                        |
| <b>Hypertension</b>                                                                                    |                               |                       |                        |
| Proportion screened (blood pressure) – n/total (%)                                                     |                               |                       |                        |
| Proportion with hypertension prescribed treatment – n/total (%)                                        |                               |                       |                        |
| <b>Reproductive tract infection (RTI)</b>                                                              |                               |                       |                        |
| Proportion screened (symptoms) – n/total (%)                                                           |                               |                       |                        |
| Proportion with RTI treated by physician – n/total (%)                                                 |                               |                       |                        |
| <b>NUTRITION</b>                                                                                       |                               |                       |                        |
| <b>Anemia</b>                                                                                          |                               |                       |                        |
| Proportion screened – n/total (%)                                                                      |                               |                       |                        |
| Median (IQR) percent days iron consumed by anemic women, n=                                            |                               |                       |                        |
| <b>PREVENTIVE AND PROMOTIVE INTERVENTIONS</b>                                                          | <b>Enrollment to 6 months</b> | <b>6 to 12 months</b> | <b>12 to 18 months</b> |
| <b>NUTRITION</b>                                                                                       |                               |                       |                        |
| Median (IQR) percent weeks ferrous fumarate plus folic acid consumed by women (anemia prophylaxis), n= |                               |                       |                        |
| Median (IQR) percent days multiple micronutrient consumed, n=                                          |                               |                       |                        |
| Median (IQR) percent days egg or milk consumed by women with BMI <21 kg/m <sup>2</sup> , n=            |                               |                       |                        |
| Median (IQR) percent days snacks consumed by women with BMI <18.5 kg/m <sup>2</sup> , n=               |                               |                       |                        |
| <b>PSYCHOSOCIAL INTERVENTION</b>                                                                       |                               |                       |                        |
| Proportion screened for depressive symptoms (PHQ-9)                                                    |                               |                       |                        |
| Proportion with depressive symptoms (PHQ-9 ≥10 or suicidal ideation) initiated treatment               |                               |                       |                        |
| Proportion counselled for positive thinking and problem solving skills                                 |                               |                       |                        |
| <b>WATER, SANITATION AND HYGIENE (WaSH)</b>                                                            |                               |                       |                        |
| Proportion of women received WaSH counselling                                                          |                               |                       |                        |

436 Anemia: Hb <12 g/dL, Hypothyroidism: TSH levels were >5.5 mIU/L or if TSH levels were between 4.0 and 5.5 mIU/L and Anti-TPO Ab positive, Prediabetes:  
 437 HbA1c between 5.7% and 6.4%, Hypertension: systolic blood pressure ≥140 mmHg and/or diastolic blood pressure ≥90 mmHg, Reproductive tract infection:  
 438 Any symptoms of vaginal discharge, itching, burning, swelling, ulcer in genital region, swelling and pain lower abdomen  
 439  
 440

441 **Table X. Compliance to interventions during pregnancy**

442

---

**HEALTH**

---

**Anemia**

Proportion screened – n/total (%)

Proportion received treatment – n/total (%)

**Urinary tract infections**

Proportion screened – n/total (%)

Proportion provided treatment – n/total (%)

**Reproductive tract infections**

Proportion screened (symptoms) – n/total (%)

Proportion treated by physician – n/total (%)

**Gestational Diabetes Mellitus**

Proportion screened – n/total (%)

Proportion provided treatment – n/total (%)

**Hypothyroidism**

Proportion screened – n/total (%)

Proportion prescribed treatment – n/total (%)

**Hypertension**

Proportion screened (blood pressure) – n/total (%)

Proportion prescribed treatment – n/total (%)

**NUTRITION**

Median (IQR) percent days micronutrient supplement consumed, n=

Median (IQR) percent days iron-folic acid consumed n=

Median (IQR) percent days calcium and Vitamin D supplement consumed, n=

Median (IQR) percent days snacks consumed by women with BMI <25 kg/m<sup>2</sup>, n=

Median (IQR) percent days egg or milk consumed by women with BMI <30 kg/m<sup>2</sup>, n=

**PSYCHOSOCIAL INTERVENTION**

Proportion screened for depressive symptoms (PHQ-9) – n/total (%)

Proportion women received counselling on positive thinking and problem solving skills – n/total (%)

**WATER, SANITATION AND HYGIENE (WaSH)**

Proportion women who provided water filter – n/total (%)

Proportion homes where hand washing stations were installed – n/total (%)

---

443

444

445

446

Anemia: Hb <11 g/dL, Urinary tract infection: Urine culture microbial growth of 10<sup>5</sup> CFU/ml, Reproductive tract infection: Any symptoms of vaginal discharge, itching, burning, swelling, ulcer in genital region, swelling and pain lower abdomen, Gestational Diabetes mellitus: 2 hr blood sugar ≥140 mg/dL in Oral Glucose Tolerance Test, Hypothyroidism: TSH levels were >2.6 mIU/L, Hypertension: Systolic blood pressure ≥140 mmHg and/or diastolic blood pressure ≥90 mmHg

447

448

449

450  
451

**Table X. Compliance to interventions in mothers during the postnatal period**

---

| <b>INTERVENTION</b>                                                                   |    |
|---------------------------------------------------------------------------------------|----|
| <b>NUTRITION</b>                                                                      | n= |
| Median (IQR) percent days micronutrient supplements consumed                          |    |
| Median (IQR) percent days iron-folic acid consumed                                    |    |
| Median (IQR) percent days calcium and vitamin D supplement consumed                   |    |
| Median (IQR) percent snacks consumed                                                  |    |
| Median (IQR) percent days milk consumed                                               |    |
| <b>PSYCHOSOCIAL</b>                                                                   |    |
| Women screened for depressive symptoms (PHQ-9), n (%)                                 |    |
| Women who received counselling on positive thinking and problem-solving skills, n (%) |    |

---

452  
453  
454  
455  
456  
457  
458



459  
460

**Table X. Compliance to interventions in children from birth to 24 months**

---

Received counselling for danger signs – n/total (%)

**Birth to 6 months**

Received lactation counselling

Median (IQR) percent days vitamin D consumed, n=

Median (IQR) days Iron consumed (for low birth weight), n=

**6 to 24 months**

Median (IQR) days iron consumed, n=

Median (IQR) days milk cereal mix consumed, n=

Received early child play and responsive care – n/total (%)

Received play mats – n/total (%)

Received potty – n/total (%)

---

461  
462  
463  
464  
465  
466  
467  
468

469 **References**

- 470 1. Haider BA, Bhutta ZA. Multiple-micronutrient supplementation for women during pregnancy.  
471 Cochrane Database Syst Rev. 2015:CD004905. <https://doi.org/10.1002/14651858.CD004905.pub4>.
- 472 2. Pena-Rosas JP, De-Regil LM, Garcia-Casal MN, Dowswell T. Daily oral iron supplementation  
473 during pregnancy. Cochrane Database Syst Rev. 2015: CD004736.  
474 <https://doi.org/10.1002/14651858.CD004736.pub5>.
- 475 3. Lassi ZS, Das JK, Zahid G, Imdad A, Bhutta ZA. Impact of education and provision of  
476 complementary feeding on growth and morbidity in children less than 2 years of age in developing  
477 countries: a systematic review. BMC Public Health 2013;13 Suppl 3:S13.
- 478 4. Schulz KF, Grimes DA. Multiplicity in randomised trials II: subgroup and interim analyses.  
479 *Lancet* 2005; **365**(9471): 1657-61
- 480 5. Giacalone M, Agata Z, Cozzucoli PC, Alibrandi A. Bonferroni-Holm and permutation tests to  
481 compare health data: methodological and applicative issues. BMC Medical Research Methodology  
482 **2018**; 18(1): 81
- 483 **6.** O'Brien PC, Fleming TR. A multiple testing procedure for clinical trials. *Biometrics* 1979;  
484 35:549-56
