# Supplementary material
Source: PubMed Central journal article supplement (PMC10762577)
Supplement: jama-e2323727-s004.pdf [file jama-e2323727-s004.pdf]

\*First name, last name, and suffix (if applicable) are required and will appear in PubMed.

| <b>*Group Name(s): Women and Infants Integrated Interventions for Growth Study (WINGS)</b> |                   |                              |                           |                                                                         |                                          |                                                         |                                                                                            |
|--------------------------------------------------------------------------------------------|-------------------|------------------------------|---------------------------|-------------------------------------------------------------------------|------------------------------------------|---------------------------------------------------------|--------------------------------------------------------------------------------------------|
| <b>*First Name and Middle Initial(s)</b>                                                   | <b>*Last Name</b> | <b>*Suffix (eg, Jr, III)</b> | Academic Degrees          | Institution                                                             | Location (city, state/province, country) | Role or Contribution, eg, chair, principal investigator | Group (if more than 1 Group listed in the byline) and/or Subgroup (eg, Steering Committee) |
| Ratan                                                                                      | Shekhawat         |                              | BDS                       | Centre for Health Research and Development, Society for Applied Studies | New Delhi, India                         |                                                         |                                                                                            |
| Sabreen                                                                                    | Siraj             |                              | MA (Psychology)           | Centre for Health Research and Development, Society for Applied Studies | New Delhi, India                         |                                                         |                                                                                            |
| Sugandhi                                                                                   | Nagpal            |                              | M.A. (Applied Psychology) | Centre for Health Research and Development, Society for Applied Studies | New Delhi, India                         |                                                         |                                                                                            |
| Farah                                                                                      | Abbasi            |                              | MA (Clinical Psychology)  | Centre for Health Research and Development, Society for Applied Studies | New Delhi, India                         |                                                         |                                                                                            |
| Heena                                                                                      | Chaudhary         |                              | MA (Psychology)           | Centre for Health Research and Development, Society for Applied Studies | New Delhi, India                         |                                                         |                                                                                            |
| Karishma                                                                                   | Sharma            |                              | MA (Applied Psychology)   | Centre for Health Research and Development, Society for Applied Studies | New Delhi, India                         |                                                         |                                                                                            |
| Farhana                                                                                    | Rafiqui           |                              | MSc                       | Centre for Health Research and Development, Society for Applied Studies | New Delhi, India                         |                                                         |                                                                                            |
| Kiran                                                                                      | Bhatia            |                              | MCA                       | Centre for Health Research and Development, Society for Applied Studies | New Delhi, India                         |                                                         |                                                                                            |
| Jasmine                                                                                    | Kaur              |                              | MSc                       | Centre for Health Research and Development, Society for Applied Studies | New Delhi, India                         |                                                         |                                                                                            |
| Medha                                                                                      | Shekhar           |                              | BA, LLB                   | Centre for Health Research and Development, Society for Applied Studies | New Delhi, India                         |                                                         |                                                                                            |

## Supplemental Online Content: Nonauthor Collaborators

\*First name, last name, and suffix (if applicable) are required and will appear in PubMed.

| *First Name and Middle Initial(s) | *Last Name | *Suffix (eg, Jr, III) | Academic Degrees | Institution                                                             | Location (city, state/province, country) | Role or Contribution, eg, chair, principal investigator | Group (if more than 1 Group listed in the byline) and/or Subgroup (eg, Steering Committee) |
|-----------------------------------|------------|-----------------------|------------------|-------------------------------------------------------------------------|------------------------------------------|---------------------------------------------------------|--------------------------------------------------------------------------------------------|
| Anita                             | Kate       |                       | BA               | Centre for Health Research and Development, Society for Applied Studies | New Delhi, India                         |                                                         |                                                                                            |
| Gunjan                            | Aggarwal   |                       | MSc              | Centre for Health Research and Development, Society for Applied Studies | New Delhi, India                         |                                                         |                                                                                            |
| Runa                              | Ghosh      |                       | MSc              | Centre for Health Research and Development, Society for Applied Studies | New Delhi, India                         |                                                         |                                                                                            |
| Kunal                             | Kishore    |                       | MA               | Centre for Health Research and Development, Society for Applied Studies | New Delhi, India                         |                                                         |                                                                                            |
| Navneet                           | Mehra      |                       | MA               | Centre for Health Research and Development, Society for Applied Studies | New Delhi, India                         |                                                         |                                                                                            |
| Nikita                            | Arya       |                       | MSc              | Centre for Health Research and Development, Society for Applied Studies | New Delhi, India                         |                                                         |                                                                                            |
| Ritu                              | Chaudhary  |                       | MS               | Centre for Health Research and Development, Society for Applied Studies | New Delhi, India                         |                                                         |                                                                                            |
| Anuradha                          | Tamaria    |                       | MS               | Centre for Health Research and Development, Society for Applied Studies | New Delhi, India                         |                                                         |                                                                                            |
| Tivendra                          | Kumar      |                       | MPH              | Centre for Health Research and Development, Society for Applied Studies | New Delhi, India                         |                                                         |                                                                                            |
| Sowmya                            | Karantha C |                       | MD               | Centre for Health Research and Development, Society for Applied Studies | New Delhi, India                         |                                                         |                                                                                            |
| Purnima                           | Modi       |                       | MD               | Centre for Health Research and Development, Society for Applied Studies | New Delhi, India                         |                                                         |                                                                                            |

## Supplemental Online Content: Nonauthor Collaborators

\*First name, last name, and suffix (if applicable) are required and will appear in PubMed.

| *First Name and Middle Initial(s) | *Last Name | *Suffix (eg, Jr, III) | Academic Degrees       | Institution                                                             | Location (city, state/province, country) | Role or Contribution, eg, chair, principal investigator | Group (if more than 1 Group listed in the byline) and/or Subgroup (eg, Steering Committee) |
|-----------------------------------|------------|-----------------------|------------------------|-------------------------------------------------------------------------|------------------------------------------|---------------------------------------------------------|--------------------------------------------------------------------------------------------|
| Neelam                            | Kaur       |                       | BA                     | Centre for Health Research and Development, Society for Applied Studies | New Delhi, India                         |                                                         |                                                                                            |
| Neha                              | Tyagi      |                       | MSc                    | Centre for Health Research and Development, Society for Applied Studies | New Delhi, India                         |                                                         |                                                                                            |
| Geeta                             | Mehto      |                       | MSc                    | Centre for Health Research and Development, Society for Applied Studies | New Delhi, India                         |                                                         |                                                                                            |
| Afifa                             | Khatun     |                       | Masters in Social Work | Centre for Health Research and Development, Society for Applied Studies | New Delhi, India                         |                                                         |                                                                                            |
| Sayeed                            | Ahmed      |                       | BA                     | Centre for Health Research and Development, Society for Applied Studies | New Delhi, India                         |                                                         |                                                                                            |
| Aparna                            | Singh      |                       | MSc                    | Centre for Health Research and Development, Society for Applied Studies | New Delhi, India                         |                                                         |                                                                                            |
| Gulafshan                         | Ansari     |                       | MSc                    | Centre for Health Research and Development, Society for Applied Studies | New Delhi, India                         |                                                         |                                                                                            |
| Ramanjeet                         | Kaur       |                       | BA                     | Centre for Health Research and Development, Society for Applied Studies | New Delhi, India                         |                                                         |                                                                                            |
| Manisha                           | Gupta      |                       | MCA                    | Centre for Health Research and Development, Society for Applied Studies | New Delhi, India                         |                                                         |                                                                                            |
| Girish Chand                      | Pant       |                       | BSc                    | Centre for Health Research and Development, Society for Applied Studies | New Delhi, India                         |                                                         |                                                                                            |
| Ankita                            | Dutta      |                       | MSc                    | Centre for Health Research and Development, Society for Applied Studies | New Delhi, India                         |                                                         |                                                                                            |

## Supplemental Online Content: Nonauthor Collaborators

\*First name, last name, and suffix (if applicable) are required and will appear in PubMed.

| *First Name and Middle Initial(s) | *Last Name | *Suffix (eg, Jr, III) | Academic Degrees       | Institution                                                                                              | Location (city, state/province, country) | Role or Contribution, eg, chair, principal investigator | Group (if more than 1 Group listed in the byline) and/or Subgroup (eg, Steering Committee) |
|-----------------------------------|------------|-----------------------|------------------------|----------------------------------------------------------------------------------------------------------|------------------------------------------|---------------------------------------------------------|--------------------------------------------------------------------------------------------|
| Deepak                            | More       |                       | MD                     | Centre for Health Research and Development, Society for Applied Studies                                  | New Delhi, India                         |                                                         |                                                                                            |
| Mukesh                            | Kumar      |                       | Masters in Social Work | Centre for Health Research and Development, Society for Applied Studies                                  | New Delhi, India                         |                                                         |                                                                                            |
| Sonia                             | Kuruville  |                       | MS                     | Centre for Health Research and Development, Society for Applied Studies                                  | New Delhi, India                         |                                                         |                                                                                            |
| Anjali                            | Chandra    |                       | MS                     | Centre for Health Research and Development, Society for Applied Studies                                  | New Delhi, India                         |                                                         |                                                                                            |
| Pradeep                           | Debata     |                       | MD                     | Vardhman Mahavir Medical College and Safdarjung Hospital                                                 | New Delhi, India                         |                                                         |                                                                                            |
| Anita                             | Yadav      |                       | MD                     | Vardhman Mahavir Medical College and Safdarjung Hospital                                                 | New Delhi, India                         |                                                         |                                                                                            |
| Abhinav                           | Jain       |                       | MD                     | Hamdard Institute of Medical Sciences and Research and Associated Hakeem Abdul Hameed Centenary Hospital | New Delhi, India                         |                                                         |                                                                                            |
| Rahul                             | Sachdev    |                       | MD                     | BR Diagnostics                                                                                           | New Delhi, India                         |                                                         |                                                                                            |
| Omprakash                         | Bansal     |                       | MD                     | Millenium Diagnostics                                                                                    | New Delhi, India                         |                                                         |                                                                                            |
| Raghav                            | Agarwal    |                       | MD                     | ML Agarwal Imaging Centre Private Limited                                                                | New Delhi, India                         |                                                         |                                                                                            |
