# Supplementary material
Source: PubMed Central journal article supplement (PMC10762577)
Supplement: jama-e2323727-s005.pdf [file jama-e2323727-s005.pdf]

## Data Sharing Statement

Upadhyay. Child Neurodevelopment After Multidomain Interventions From Preconception Through Early Childhood. *JAMA*. Published January 02, 2024. doi:10.1001/jama.2023.23727

### Data

**Data available:** No

### Additional Information

**Explanation for why data not available:** The organization conducting the trial (Society for Applied Studies, India) is a collaborator in the Healthy Birth, Growth, and Development Knowledge Integration (HBGDki) of the Bill & Melinda Gates Foundation and the data generated from the study will be shared as part of the HBGDKi repository (<https://github.com/HBGDKi>). Individual requests will also be considered on a case-to-case basis. The request for data should be accompanied by a detailed proposal describing the scientific questions to be addressed. Proposals should be submitted to ST ([sunita.taneja@sas.org.in](mailto:sunita.taneja@sas.org.in)).
